# Supplementary material
Source: publisher site journal article supplement (https://www.spandidos-publications.com/2534/downloadSupplementary)

Figure S1. Flowchart representation of the experimental study design.

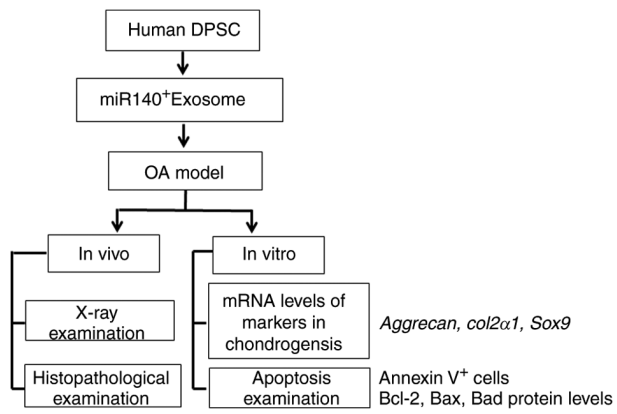

Figure S2. Effect of DPSC-derived exosomes on cartilage tissue in OA rats by H&E staining. (A) The histological sections of rat cartilage tissues were stained using H&E. Photomicrograph shows a loss of surface layers in rats with OA in comparison with the sham operation group (blank control group). Changes in the ground substance can be also observed. Treatments with DPSC-derived exosomes could improve the pathology changes in OA rats. (B) Photomicrograph of H&E staining was scored using the OARSI score system, including structure, chondrocytes, and tidemark (\*\* $P < 0.01$ ; means  $\pm$  SD,  $n = 6$ ). Scale bars, 50  $\mu\text{m}$ . DPSCs, dental pulp stem cells; OA, osteoarthritis.

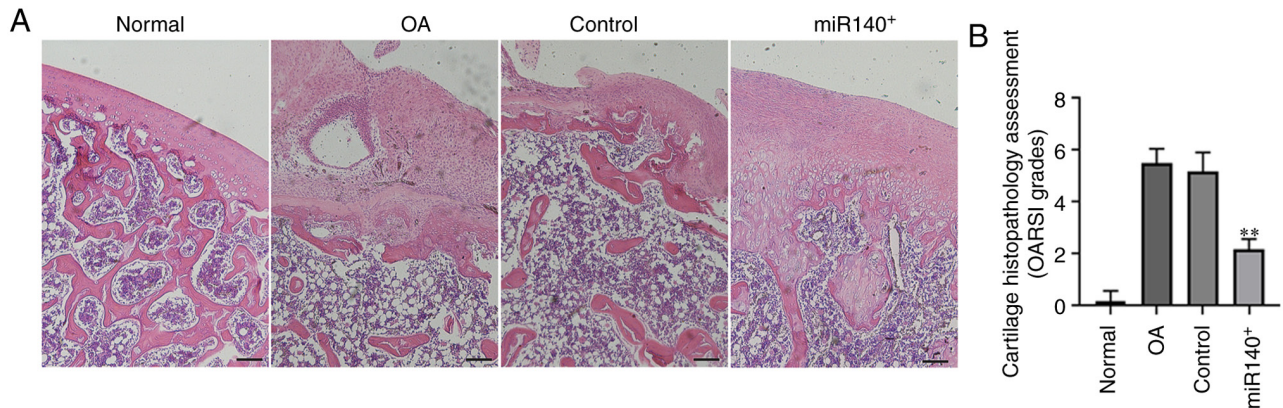

Supplement: Supplementary file 1 [file downloadSupplementary]
